# Supplementary material for: Do hotspots fuel malaria transmission: a village-scale spatio-temporal analysis of a 2-year cohort study in The Gambia
Source: BMC Med. 2018 Sep 14;16:160. doi: 10.1186/s12916-018-1141-4 (PMC6137946; doi:10.1186/s12916-018-1141-4)
Supplement: Supplementary file 2 — Description of the geostatistical model including outputs. (PDF 181 kb) [file 12916_2018_1141_MOESM1_ESM.pdf]

## **Additional File 1: Geostatistical analysis**

## Model formulation

Let  $Y_{ij}$  denote a random binary outcome associated with the  $j$ -th individual at the household location  $x_i$  and month  $t_i$ , taking value 1 for a positive PCR test for *Plasmodium falciparum* and 0 otherwise. Conditionally on a spatial Gaussian process  $S(x_i)$ , we model the probability of a positive PCR test,  $p_j(x_i, t_i)$ , using a probit-linear regression, i.e.

$$\Phi\{p_j(x_i, t_i)\}^{-1} = \alpha + \sum_{k=1}^p \beta_k d_k(x_i, t_i) + \gamma e_{ij} + S(x_i), \quad (1)$$

where  $e_{ij}$  is the age of the sampled individual, the  $d_k(x_i, t_i)$  are a set of spatio-temporally referenced covariates (see Table 1) and  $(\alpha, \beta, \gamma)$  are regression coefficients to be estimated.

We model  $S(x)$  as an isotropic and stationary Gaussian process with covariance function given by

$$\text{cov}\{S(x), S(x')\} = \sigma^2 \exp\{-\|x - x'\|/\phi\}$$

where  $\sigma^2$  is the variance of  $S(x)$  and  $\phi$  is a scale parameter which regulates how fast the spatial correlation decays to 0 for increasing distance.

We use Bayesian methods of inference with following set of independent priors:

- $\alpha \sim N(0, 10^3)$ ;
- $\beta_k \sim N(0, 10^3)$ ,  $k = 1, \dots, 4$ ;
- $\gamma \sim N(0, 10^3)$ ;
- $\log\{\sigma^2\} \sim (0, 2.5)$ ;
- $\log\{\phi\} \sim (\log 100, 1)$ .

We fit the model using a data-augmentation approach (Holmes & Held, 2011) implemented in the **PrevMap** R package (Giorgi & Diggle, 2017). Table 2 reports the posterior point and interval estimates for the model parameters.

Table 1: List of the spatio-temporally referenced explanatory variables.

| Regression coefficient | Covariate                                       |
|------------------------|-------------------------------------------------|
| $\beta_1$              | Rainfall (mm)                                   |
| $\beta_2$              | Distance from the closest waterway (m)          |
| $\beta_3$              | Distance from the main road (m)                 |
| $\beta_4$              | Binary indicator of post-MDA year (1=yes, 0=no) |

## References

- GIORGI, E. & DIGGLE, P. J. (2017). PrevMap: An R package for prevalence mapping. *Journal of Statistical Software* **78**, 1–29.
- HOLMES, C. & HELD, L. (2011). Response to van der lans. *Bayesian Anal.* **6**, 357–358.

Table 2: Posterior summaries from the model in (1), including the posterior mean and 95% credible intervals (CI).

|                       | Poterior mean | 95% CI             |
|-----------------------|---------------|--------------------|
| $\alpha$              | 237.696       | (193.844, 285.425) |
| $\beta_1$             | -0.002        | (-0.003, -0.001)   |
| $\beta_2 \times 10^3$ | -8.342        | (-10.526, -6.401)  |
| $\beta_3 \times 10^3$ | 1.030         | (0.736, 1.310)     |
| $\beta_4 \times 10^3$ | -3.339        | (-6.301, -0.729)   |
| $\gamma$              | -0.119        | (-0.143, -0.097)   |
| $\sigma^2$            | 0.070         | (0.042, 0.104)     |
| $\phi$                | 102.506       | (47.099, 192.768)  |
